# Supplementary material for: Do Non-HLA Genes Influence Development of Persistent Islet Autoimmunity and Type 1 Diabetes in Children With High-Risk HLA-DR,DQ Genotypes?
Source: Oxford University Press journal article supplement (doi:10.2337/db08-1179), 2009-02-02
Supplement: db08-11791_suppl.doc [file db08-11791_suppl.doc]

**Suppl. Table 1: Characteristics of DAISY NEC (general population) and SOC (siblings and offspring) cohorts**

|  | **NEC: General population cohort** | | | **SOC: Siblings and Offspring cohort** | | |
| --- | --- | --- | --- | --- | --- | --- |
| **Characteristic** | **Affected with IA (N=38)** | **Unaffected**  **(N=1333)** | **Unadjusted HR**  **(95% CI)** | **Affected with IA (N=74)** | **Unaffected**  **(N=1004)** | **Unadjusted HR**  **(95% CI)** |
| HLA-DR3/4 DQB1*0302,No. (%) | 23 (60.5%) | 366 (27.5%) | **3.84 (2.00-7.36)*** | 24 (32.4%) | 77 (7.7%) | **5.01 (3.08-8.15)*** |
| Female, No. (%) | 20 (52.6%) | 634 (47.6%) | 1.25 (0.66-2.37) | 42 (56.8%) | 472 (47.0%) | 1.43 (0.91-2.27) |
| Non-Hispanic white, No. (%) | 30 (79.0%) | 858 (64.4%) | 1.71 (0.78-3.73) | 66 (89.2%) | 809 (81.9%) | 1.55 (0.74-3.23) |
| # Follow-up time, mean (SD), y | 5.59 (3.7) | 6.29 (4.4) |  | 4.48 (3.5) | 8.22 (4.3) |  |

Please note that DAISY cohort is highly enriched in *HLA* DR3/4 DQB1*0302 genotypes.

# For affected, age of the child at the 1st of the 2 consecutive positive visits; for unaffected, age of the child at the last visit

* p value < 0.001

**Suppl. Table 2: Association of 3 SNPs with conversion to persistent IA and progression from persistent IA to T1D by cohort**

| **Gene (SNP)** | **Allele Counts (Freq.)** | | **Univariate analyses** | | **Conversion to persistent IA**† | | **Progression to T1D** †† | |
| --- | --- | --- | --- | --- | --- | --- | --- | --- |
| **Risk allele** | **Affected** | **Unaffected** | **Unadj. HR**  **(95% CI)** | **P value** | **Adjusted HR (95% CI)** | **P value** | **Adjusted HR (95% CI)** | **P value** |
| **NEC #** | **(N=38)** | **(N=1333)** |  |  | **(38/1371)** |  | **(13/38)** |  |
| PTPN22 (T) | 8 (10.8%) | 224 (8.4%) | 1.22 (0.59-2.53) | 0.598 | 1.33 (0.64-2.77) | 0.437 | 2.31 (0.44-12.11) | 0.322 |
| INS (A) | 61 (80.3%) | 1814 (68.6%) | **1.91 (1.08-3.36)** | **0.026** | 1.69 (0.96-2.97) | 0.071 | 0.78 (0.29-2.09) | 0.622 |
| CTLA4 (G) | 40 (52.6%) | 1050 (39.7%) | **1.58 (1.02-2.45)** | **0.041** | **1.57 (1.01-2.44)** | **0.046** | 0.83 (0.33-2.11) | 0.694 |
| **SOC #** | **(N=74)** | **(N=1004)** |  |  | **(74/1078)** |  | **(34/74)** |  |
| PTPN22 (T) | 29 (19.9%) | 228 (11.4%) | **1.95 (1.27-3.00)** | **0.002** | **2.17 (1.41-3.33)** | **<0.001** | 0.66 (0.30-1.43) | 0.288 |
| INS (A) | 115 (77.7%) | 1509 (76.1%) | 1.10 (0.74-1.65) | 0.627 | 1.37 (0.90-2.08) | 0.146 | 2.08 (0.94-4.59) | 0.069 |
| CTLA4 (G) | 55 (37.7%) | 800 (40.0%) | 0.89 (0.63-1.25) | 0.504 | 1.01 (0.72-1.43) | 0.935 | **0.41 (0.22-0.78)** | **0.006** |

† parametric model controlled for *HLA*-DR3/4,DQB1*0302, ethnicity, gender and first-degree relative with T1D

†† parametric model controlled for above and age at onset of IA

# NEC = general population cohort and SOC = siblings and offspring cohort
